# Supplementary material for: Effect of Zn substitution at a Cu site on the transport behavior and thermoelectric properties in Cu3SbSe4
Source: Royal Society of Chemistry journal article supplement (doi:10.1039/c5ra21165d), 2016-01-01
Supplement: c5ra21165d1.pdf [file c5ra21165d1.pdf]

**Supporting information for**

**Effect of Zn substitution at Cu site on the transport behavior and  
thermoelectric properties in Cu<sub>3</sub>SbSe<sub>4</sub>**

Aparabal Kumar, P. Dhama, Deepash S. Saini and P. Banerji\*

Materials Science Centre, Indian Institute of Technology, Kharagpur 721302, India

**Table S1.** Refined structural parameters in *I-42m* space group of the tetragonal crystal structure of Cu<sub>3</sub>SbSe<sub>4</sub> at room temperature.

| <b>Cu<sub>3</sub>SbSe<sub>4</sub></b>                                                         |          |          |          |                  |
|-----------------------------------------------------------------------------------------------|----------|----------|----------|------------------|
| <b><i>I-42m</i> (Tetragonal)</b>                                                              |          |          |          |                  |
| <b>Atom</b>                                                                                   | <b>x</b> | <b>y</b> | <b>z</b> | <b>Occupancy</b> |
| <b>Se</b>                                                                                     | 0.2366   | 0.2366   | 0.1310   | 4                |
| <b>Cu(1)</b>                                                                                  | 0        | 0        | 0        | 1                |
| <b>Sb</b>                                                                                     | 0        | 0        | 0.5      | 1                |
| <b>Cu(2)</b>                                                                                  | 0        | 0.5      | 0.25     | 2                |
| <b><math>a = 5.6590, b = 5.6590, c = 11.2622, \alpha = 90, \beta = 90, \gamma = 90</math></b> |          |          |          |                  |
| <b><math>R_{\text{Bragg}} = 4.904, R_{\text{RF}} = 7.467, \chi^2 = 2.81</math></b>            |          |          |          |                  |

\*Corresponding author. Tel: +91 3222 283984.

*E-mail address:* pallab@matsc.iitkgp.ernet.in (P. Banerji).

**Table S2.** Refined structural parameters in  $\text{Cu}_{2.5}\text{Zn}_{0.5}\text{SbSe}_4$  at room temperature.

| $\text{Cu}_{2.5}\text{Zn}_{0.5}\text{SbSe}_4$<br><i>I-42m</i> (Tetragonal)             |         |         |         |           | $\text{CuSbSe}_2$<br><i>Pnma</i> (Orthorhombic)                                        |          |         |         |           |
|----------------------------------------------------------------------------------------|---------|---------|---------|-----------|----------------------------------------------------------------------------------------|----------|---------|---------|-----------|
| Atom                                                                                   | x       | y       | z       | Occupancy | Atom                                                                                   | x        | y       | z       | Occupancy |
| Se                                                                                     | 0.23431 | 0.23431 | 0.13892 | 4         | Se(1)                                                                                  | 0.09694  | 0.25000 | 0.35828 | 1         |
| Cu(1)                                                                                  | 0       | 0       | 0       | 1         | Cu                                                                                     | -0.11344 | 0.75000 | 0.31459 | 1         |
| Sb                                                                                     | 0       | 0       | 0.5     | 1         | Sb                                                                                     | 0.28622  | 0.25000 | 0.44470 | 1         |
| Cu(2)                                                                                  | 0       | 0.5     | 0.25    | 2         | Se(2)                                                                                  | -0.38377 | 0.75000 | 0.37702 | 1         |
| $a = 5.649473, b = 5.649473, c = 11.246007,$<br>$\alpha = 90, \beta = 90, \gamma = 90$ |         |         |         |           | $a = 6.209943, b = 3.983085, c = 14.991263,$<br>$\alpha = 90, \beta = 90, \gamma = 90$ |          |         |         |           |
| $R_p = 13.0 \quad R_{wp} = 10.7 \quad R_{exp} = 7.03, \chi^2 = 2.31$                   |         |         |         |           |                                                                                        |          |         |         |           |

**Table S3.** Refined structural parameters in  $\text{Cu}_2\text{ZnSbSe}_4$  at room temperature.

| $\text{Cu}_2\text{ZnSbSe}_4$<br><i>I-42m</i> (Tetragonal)                              |         |         |         |           | $\text{CuSbSe}_2$<br><i>Pnma</i> (Orthorhombic)                                        |          |         |         |           |
|----------------------------------------------------------------------------------------|---------|---------|---------|-----------|----------------------------------------------------------------------------------------|----------|---------|---------|-----------|
| Atom                                                                                   | x       | y       | z       | Occupancy | Atom                                                                                   | x        | y       | z       | Occupancy |
| Se                                                                                     | 0.24373 | 0.24373 | 0.13236 | 4         | Se(1)                                                                                  | -0.10026 | 0.25000 | 0.39040 | 1         |
| Cu(1)                                                                                  | 0       | 0       | 0       | 1         | Cu                                                                                     | -0.18609 | 0.75000 | 0.33349 | 1         |
| Sb                                                                                     | 0       | 0       | 0.5     | 1         | Sb                                                                                     | 0.29103  | 0.25000 | 0.43822 | 1         |
| Cu(2)                                                                                  | 0       | 0.5     | 0.25    | 2         | Se(2)                                                                                  | -0.63791 | 0.75000 | 0.33706 | 1         |
| $a = 5.651992, b = 5.651992, c = 11.229217,$<br>$\alpha = 90, \beta = 90, \gamma = 90$ |         |         |         |           | $a = 6.289621, b = 3.976935, c = 14.972906,$<br>$\alpha = 90, \beta = 90, \gamma = 90$ |          |         |         |           |
| $R_p = 18.6, R_{wp} = 13.0, R_{exp} = 8.21, \chi^2 = 2.52$                             |         |         |         |           |                                                                                        |          |         |         |           |
